# Supplementary material for: Hyphal Growth and Conidia Germination Are Induced by Phytohormones in the Root Colonizing and Plant Growth Promoting Fungus Metarhizium guizhouense
Source: MDPI journal article supplement (doi:10.3390/jof9090945), 2023-09-19
Supplement: s1 [file s1]

## Supplementary material

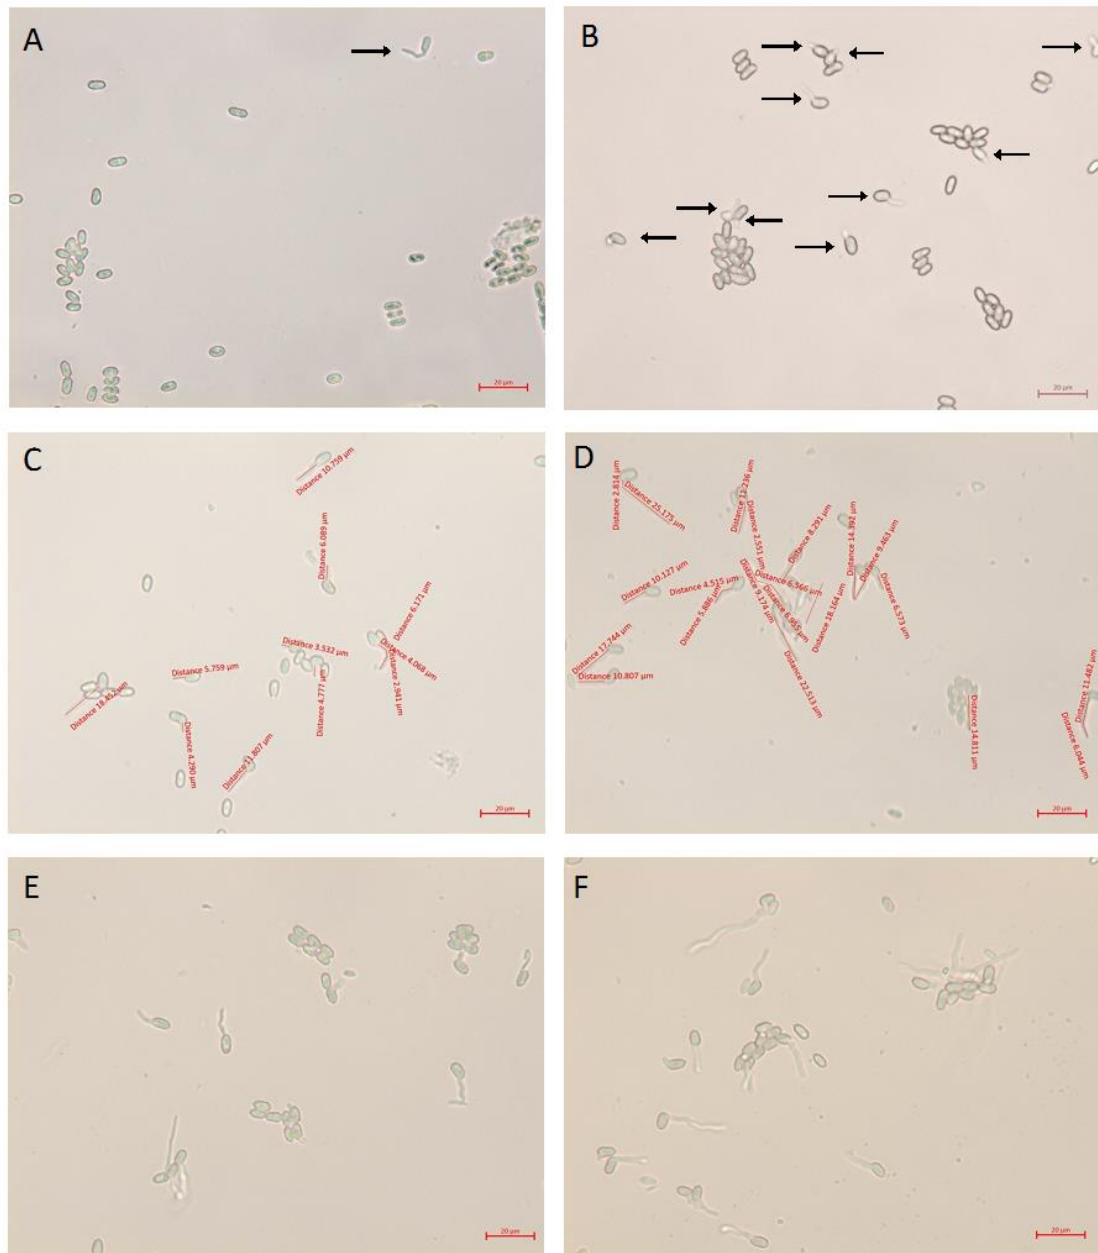

**Figure S1.** Brightfield microscopy image of germinated conidia. **A and B:**) Image of the conidia from the control treatment at 6 h of growth and the treatment with the phytohormone gibberellic acid GA<sub>3</sub> at a concentration of  $1 \times 10^{-6}$  M at 6 h of growth, respectively. The black arrows indicate the germinated conidia. **C and D:**) Image of the conidia of the control treatment at 10 h of growth and the treatment with the phytohormone strigolactone synthase rac-GR24 (GR24) at a concentration of  $1 \times 10^{-5}$  M at 10 h of growth. Red indicates the lengths of the hyphae obtained with the Zeiss Blue edition program. **E and F:**) Image of the conidia of the control treatment at 10 h of growth and the treatment with the phytohormone gibberellic acid (GA<sub>3</sub>) at a concentration of  $1 \times 10^{-5}$  M at 10 h of growth.

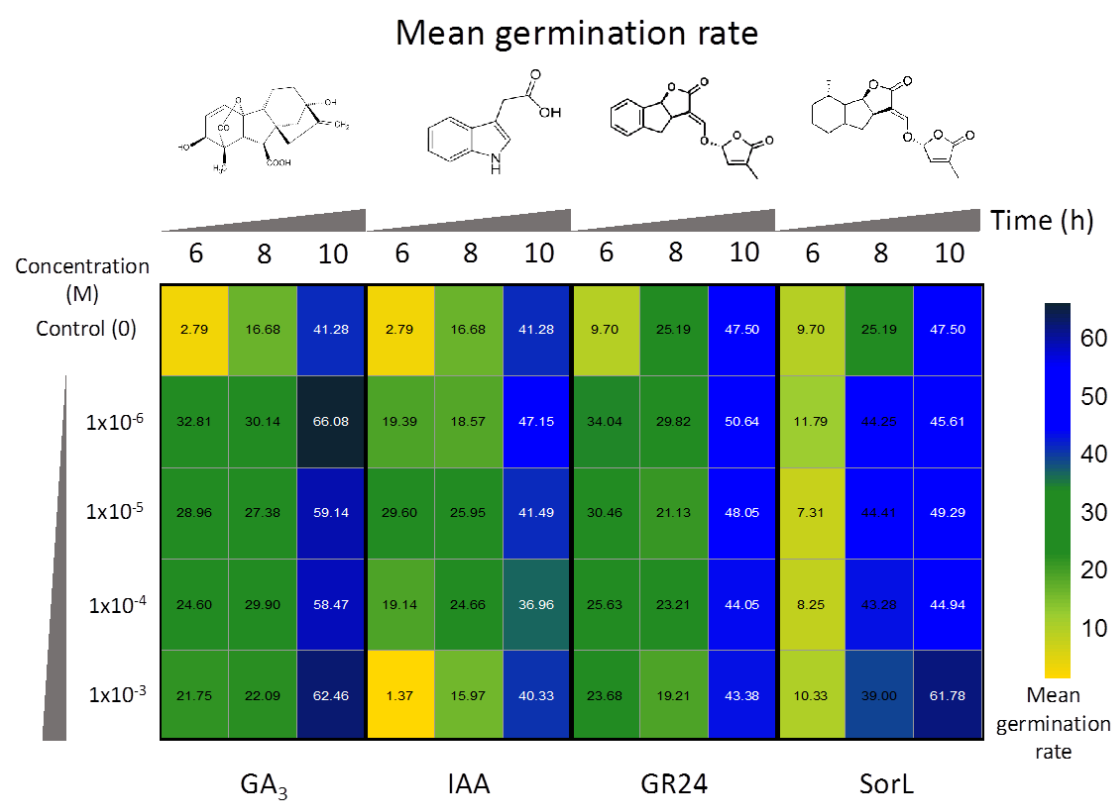

**Figure S2.** Heatmap of average germination rates. Phytohormone: GA<sub>3</sub>: gibberellic acid, IAA; 3-indole acetic acid, GR24; synthetic strigolactone rac-GR24, SorL; strigolactone (+/-)-sorgolactone. The number indicates the average percentage of germination of each treatment.

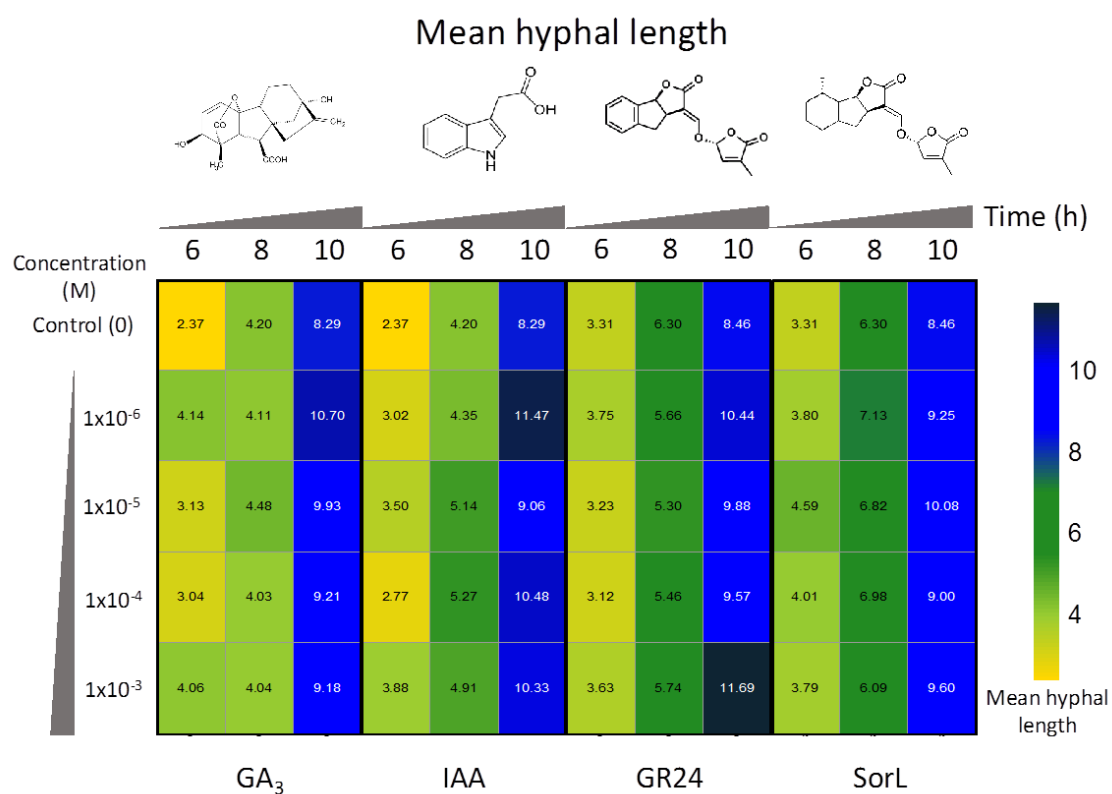

**Figure S3.** Heatmap of average hyphal length. Phytohormone: GA<sup>3</sup>: Gibberellic acid, IAA; 3-indole acetic acid, GR24; Strigolactone synthase rac-GR24, SorL; Strigolactone (+/-)-sorgolactone. The number indicates the average hyphal length of each treatment

**Table S1.** Mean germination rate and standard deviation.

| Phytohormone concentration | GA3    |        |        | IAA    |        |       | GR24   |       |       | SorL  |        |        |
|----------------------------|--------|--------|--------|--------|--------|-------|--------|-------|-------|-------|--------|--------|
|                            | 6h     | 8h     | 10h    | 6h     | 8h     | 10h   | 6h     | 8h    | 10h   | 6h    | 8h     | 10h    |
| Control (0 M)              | 2.793  | 16.68  | 41.28  | 2.793  | 16.68  | 41.28 | 9.695  | 25.19 | 47.5  | 9.695 | 25.19  | 47.5   |
| SD Control                 | 3.296  | 1.732  | 9.036  | 3.296  | 1.732  | 9.036 | 6.335  | 12.95 | 12.46 | 6.335 | 12.95  | 12.46  |
| 1x10 <sup>-6</sup> M       | 32.81* | 30.14* | 66.08* | 19.39* | 18.57  | 47.15 | 34.04* | 29.82 | 50.64 | 11.79 | 44.25  | 45.61  |
| SD 1x10 <sup>-6</sup> M    | 11.8   | 4.344  | 5.43   | 6.527  | 3.044  | 10.04 | 9.556  | 6.907 | 6.188 | 2.203 | 4.554  | 6.429  |
| 1x10 <sup>-5</sup> M       | 28.96* | 27.38* | 59.14* | 29.6*  | 25.95* | 41.49 | 30.46* | 21.13 | 48.05 | 7.312 | 44.41* | 49.29  |
| SD 1x10 <sup>-5</sup> M    | 12.49  | 5.813  | 13.03  | 6.134  | 4.956  | 11.21 | 7.438  | 12.21 | 13.9  | 2.96  | 10.08  | 9.894  |
| 1x10 <sup>-4</sup> M       | 24.6*  | 29.9*  | 58.47* | 19.14* | 24.66  | 36.96 | 25.63* | 23.21 | 44.05 | 8.252 | 43.28* | 44.94  |
| SD 1x10 <sup>-4</sup> M    | 12.81  | 9.721  | 12.53  | 14.58  | 6.665  | 11.25 | 7.471  | 4.898 | 5.977 | 4.974 | 7.335  | 8.544  |
| 1x10 <sup>-3</sup> M       | 21.75* | 22.09  | 62.46* | 1.373  | 15.97  | 40.33 | 23.68* | 19.21 | 43.38 | 10.33 | 39*    | 61.78* |
| SD 1x10 <sup>-3</sup> M    | 14.06  | 4.643  | 8.478  | 0.3076 | 7.034  | 9.822 | 11.1   | 7.589 | 7.526 | 6.365 | 5.591  | 4.555  |

\* Values with significant statistical difference

**Table S2.** Mean hyphal length and standard deviation

| Phytohormone concentration | GA3    |       |        | IAA    |        |        | GR24   |       |        | SorL   |       |        |
|----------------------------|--------|-------|--------|--------|--------|--------|--------|-------|--------|--------|-------|--------|
|                            | 6h     | 8h    | 10h    | 6h     | 8h     | 10h    | 6h     | 8h    | 10h    | 6h     | 8h    | 10h    |
| Control (0 M)              | 2.367  | 4.197 | 8.293  | 2.367  | 4.197  | 8.293  | 3.311  | 6.302 | 8.459  | 3.311  | 6.302 | 8.459  |
| SD Control                 | 1.245  | 1.934 | 4.647  | 1.245  | 1.934  | 4.647  | 1.551  | 3.081 | 4.516  | 1.551  | 3.081 | 4.516  |
| 1x10 <sup>-6</sup> M       | 4.143* | 4.113 | 10.7*  | 3.022  | 4.348  | 11.47* | 3.746* | 5.661 | 10.44* | 3.801  | 7.131 | 9.254  |
| SD 1x10 <sup>-6</sup> M    | 1.984  | 2     | 4.952  | 1.334  | 1.87   | 6.183  | 1.746  | 2.788 | 6.193  | 1.544  | 3.836 | 5.259  |
| 1x10 <sup>-5</sup> M       | 4.058* | 4.04  | 9.18*  | 3.883* | 4.912  | 10.33* | 3.626  | 5.744 | 11.69* | 3.792  | 6.087 | 9.604* |
| SD 1x10 <sup>-5</sup> M    | 1.97   | 1.924 | 4.488  | 1.842  | 2.547  | 6.04   | 1.63   | 2.956 | 6.604  | 1.844  | 3.2   | 4.89   |
| 1x10 <sup>-4</sup> M       | 3.037* | 4.029 | 9.214* | 2.769  | 5.272* | 10.48* | 3.123  | 5.461 | 9.57   | 4.011  | 6.977 | 9.002  |
| SD 1x10 <sup>-4</sup> M    | 1.367  | 2.07  | 4.748  | 1.152  | 2.473  | 5.93   | 1.242  | 2.755 | 5.351  | 2.153  | 3.716 | 4.642  |
| 1x10 <sup>-3</sup> M       | 3.126  | 4.477 | 9.928* | 3.503* | 5.137* | 9.063  | 3.227  | 5.305 | 9.88*  | 4.589* | 6.817 | 10.08* |
| SD 1x10 <sup>-3</sup> M    | 1.764  | 2.337 | 5.268  | 1.618  | 2.694  | 5.397  | 1.271  | 2.884 | 5.439  | 2.513  | 3.421 | 5.117  |

\* Values with significant statistical difference
